# Supplementary material for: Stability of ZnMOx–SAPO-11 (OXZEO) composite catalysts for syngas conversion to gasoline
Source: Royal Society of Chemistry journal article supplement (doi:10.1039/d3cy01166f), 2023-12-26
Supplement: d3cy01166f1.pdf [file d3cy01166f1.pdf]

# **Stability of ZnMO<sub>x</sub>-SAPO-11 (OXZEO) Composite**

## **Catalysts for Syngas Conversion to Gasoline**

Jingyao Feng,<sup>1,2</sup> Dengyun Miao,<sup>1,2,\*</sup> Yilun Ding,<sup>1,2</sup> Feng Jiao,<sup>1,2</sup> Xiulian Pan,<sup>1,2,\*</sup> Xinhe Bao<sup>1,2</sup>

<sup>1</sup>State Key Laboratory of Catalysis, Dalian Institute of Chemical Physics, Chinese Academy of Sciences, Dalian 116023, China

<sup>2</sup>University of Chinese Academy of Sciences, Beijing 100049, China

\*Corresponding Authors :

dengyunmiao@dicp.ac.cn (Dengyun Miao);

panxl@dicp.ac.cn (Xiulian Pan).

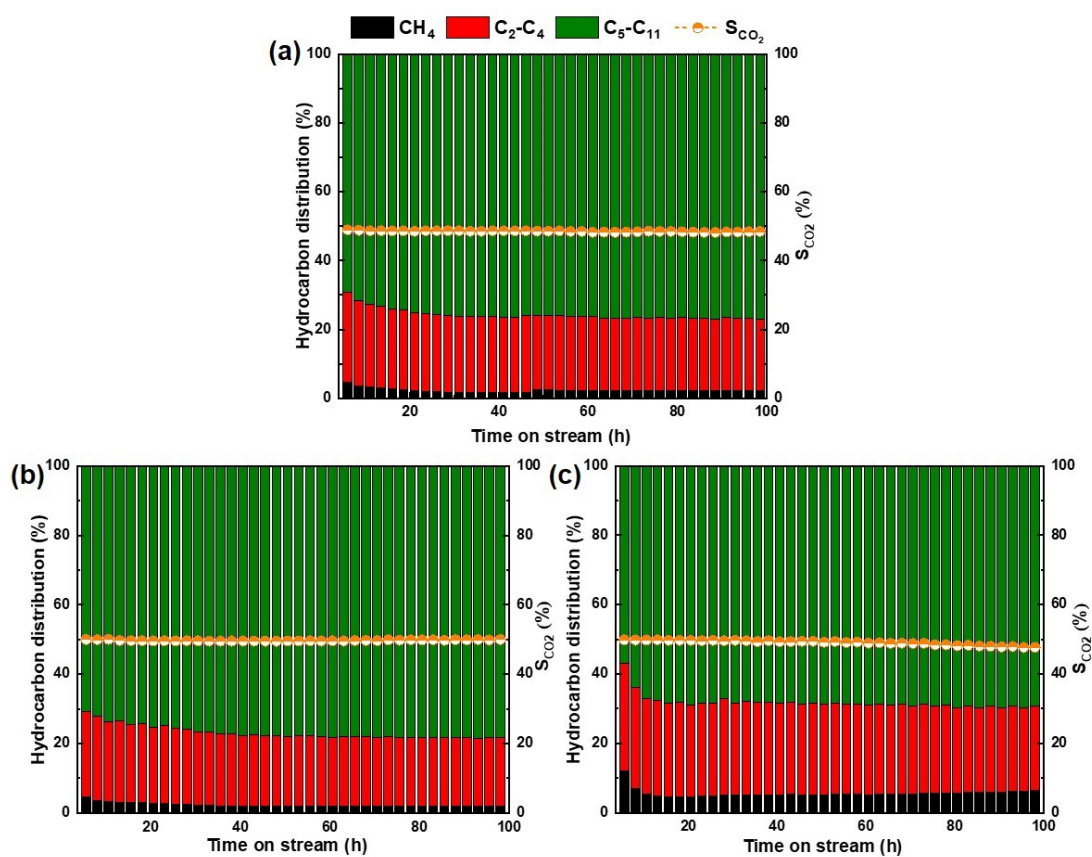

**Fig. S1.** Hydrocarbon distribution and CO<sub>2</sub> selectivity ( $S_{CO_2}$ ) of different OX-SAPO-11 composite catalysts in syngas conversion during 100 h reaction. (a) ZnAlO<sub>x</sub>-SAPO-11; (b) ZnCrO<sub>x</sub>-SAPO-11; (c) ZnMnO<sub>x</sub>-SAPO-11. Reaction conditions: OX/SAPO-11 = 1/1 (mass ratio), H<sub>2</sub>/CO = 1/1, 360 °C, 4 MPa, GHSV = 1000 mL/g/h.

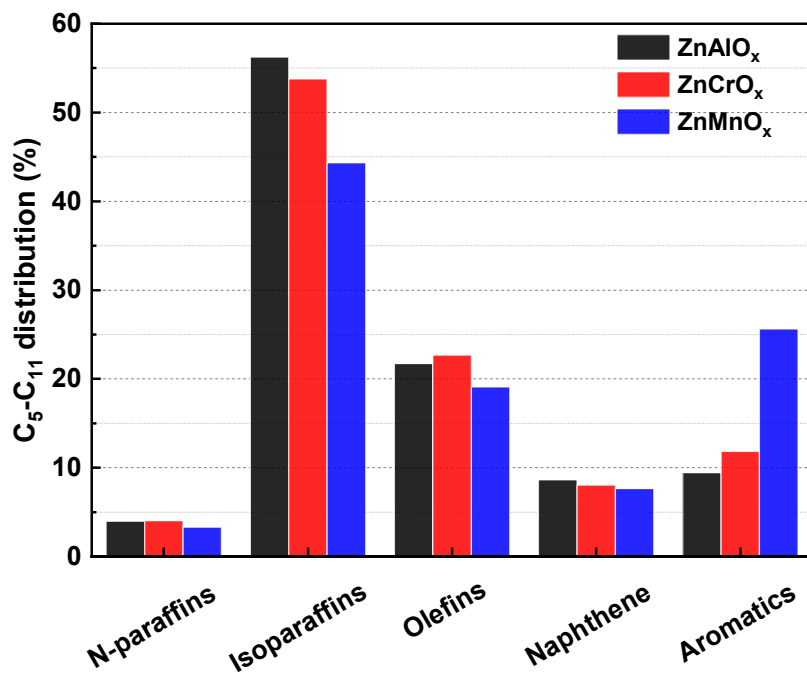

**Fig. S2.** C<sub>5</sub>-C<sub>11</sub> hydrocarbon distribution over ZnMO<sub>x</sub>-SAPO-11 in syngas conversion at time on stream of around 16 h. “M” stands for Al, Cr or Mn.

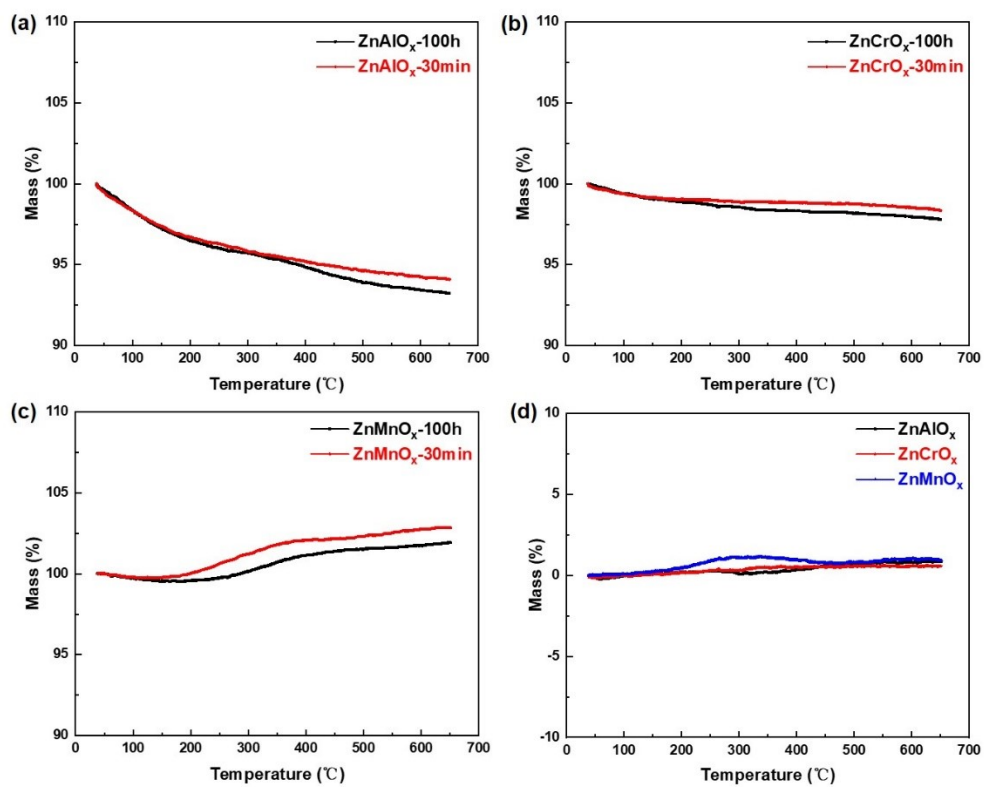

**Fig. S3.** TG profiles of different oxides. (a) ZnAlO<sub>x</sub>; (b) ZnCrO<sub>x</sub>; (c) ZnMnO<sub>x</sub>; (d) the result by subtracting the ZnMO<sub>x</sub>-100h curve from the ZnMO<sub>x</sub>-30min curve. “M” represents for Al, Cr or Mn.

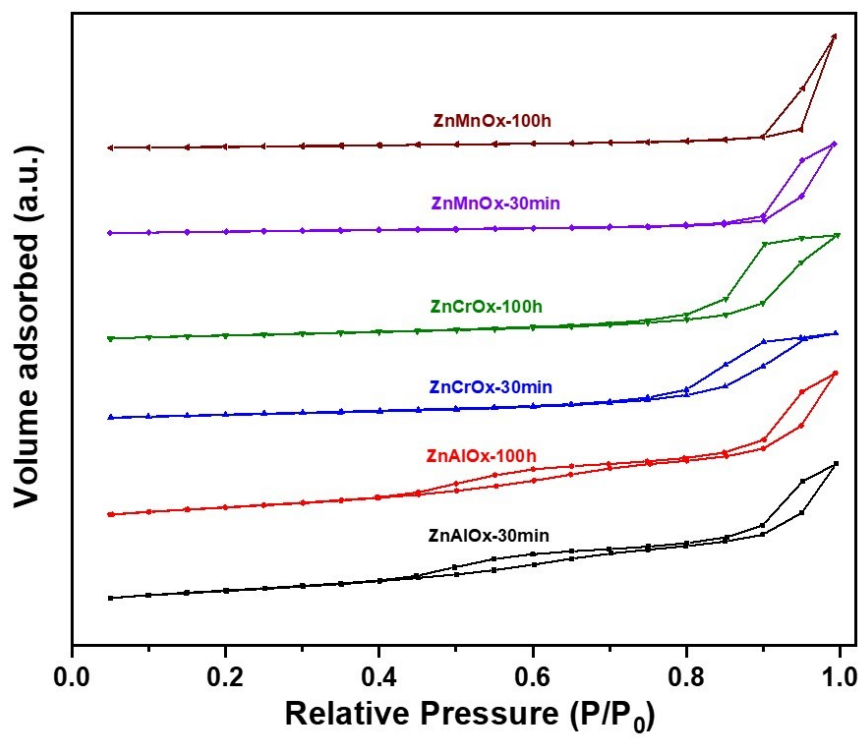

Fig. S4.  $N_2$  adsorption-desorption isotherms of the samples.

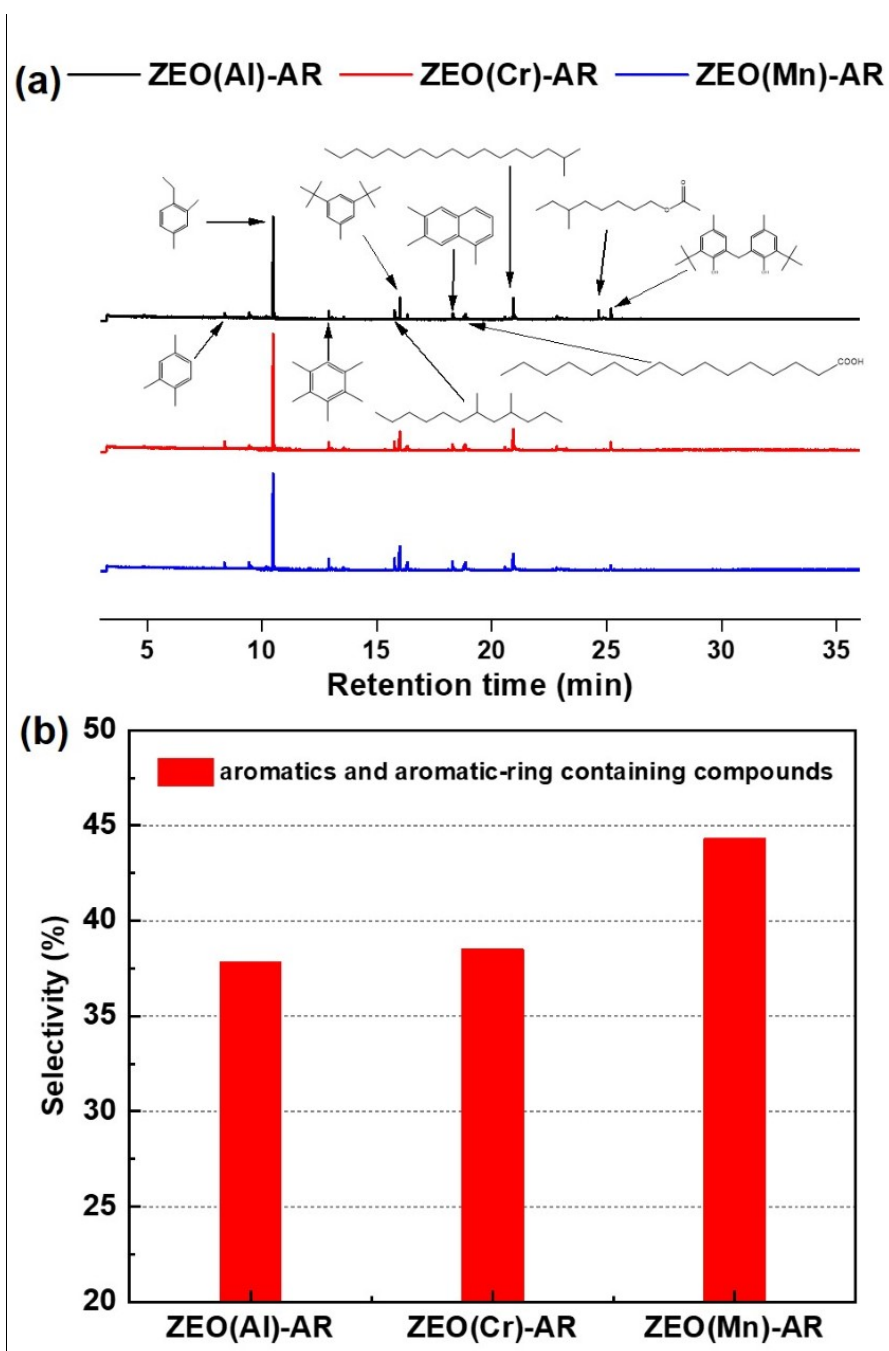

**Fig. S5.** (a) Gas chromatography-mass spectrometry chromatograms of organic species in different SAPO-11 after reaction; (b) The fraction of aromatics and aromatic-ring containing compounds in the accumulated carbonaceous species.

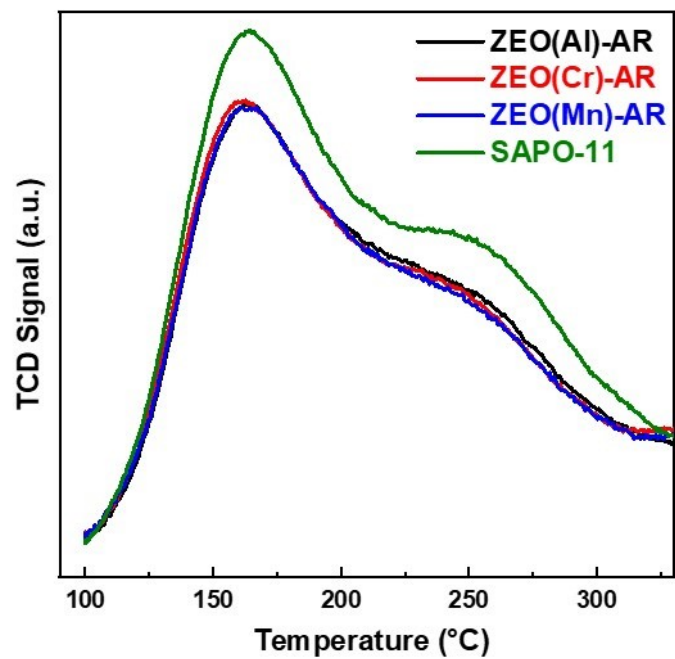

**Fig. S6.** NH<sub>3</sub>-TPD profiles of used and fresh SAPO-11. Note that all the samples were pretreated at 300 °C before NH<sub>3</sub> adsorption.

**Table S1.** Textural property of different oxides.

| <b>Samples</b>            | <b>Specific surface areas (m<sup>2</sup>/g)</b> |
|---------------------------|-------------------------------------------------|
| ZnAlO <sub>x</sub> -30min | 143.1                                           |
| ZnAlO <sub>x</sub> -100h  | 128.9                                           |
| ZnCrO <sub>x</sub> -30min | 53.1                                            |
| ZnCrO <sub>x</sub> -100h  | 48.3                                            |
| ZnMnO <sub>x</sub> -30min | 23.2                                            |
| ZnMnO <sub>x</sub> -100h  | 19.6                                            |
